# Supplementary material for: Essential role of conserved DUF177A protein in plastid 23S rRNA accumulation and plant embryogenesis
Source: PubMed Central journal article supplement (PMC5049393; doi:10.1093/jxb/erw311), 2016-08-29
Supplement: supp_erw311_Supplementary_Data_S1.pdf [file supp_erw311_Supplementary_Data_S1.pdf]

>DUF177A1\_Oryza\_sati va

-----MI GFGI GGVAGALPLVLRRTCTPPPP  
-----MAMTPLH--H  
TCSFFFRPQSP-----SLSHSPCAAAADDDFF-----TVDYD-----PEEEK-----  
-----EEDEEGSPWEGAVVYRRDASVHHLEYATTLERLGLGDLSSSTHSRARAATMGI LI LSS  
TNLTGTKDDTPVLVSLDVARR-RGRRLLDGI VRTVI TLGCFCAEPAPQGI FANFSLLLTEDRV-EEP-DVVDLGTI FE  
EEQTKAPSLTGSQED-GDDEDI DWDDRLHFPAAGEKEI DI SKHI RDI I HLEI TLDALCSPTCKGLCLGCGENLN-TSSCSC  
NAEKQQ--AKNVQR-----RGPLKDLLKPLQR-----

>DUF177A\_Sorghum\_bi col or

-----MGRARSCT-----  
-----  
-----RRDAVVHLEYATTLERLGLGDLSSPDSRARAANLGLGLSGG  
GQDGTAAQSQTPVLVSLDVTRR-RGRRLLDGI VRTVI TLGCFCAEPAPQGI FANFSLLLTEDPV-EEP-DVVDLGTI FE  
EDI AKGASLAGTMDNQDDQDI DWDDRLHFPAADREI DI SKHI RDI I HLEI TLDVAVCPNCKGLCLSCGANLN-TSSCTC  
NKGKPK-EPKNVKG-----RGPLKELLKPMQKR-----

>DUF177A2\_Oryza\_sati va

-----LVGETRRRRE  
RPALLLPVTVPP-----  
-----STVDRPPLRRLAAS-----  
-----TLPPTASRATSPRRRPELQPPPRVNC--CAEPAPQGI FANFSLLLTEGRV-EEP-DVVDLGTI FE  
EEQTKAPVLTGSQED-GDDEDI DWDDRLHFPAAGEKEI DI SKHI RDI I HLEI TLDALCSPTCKGLCVGCGENLN-TSSCSC  
NTEKQAKAKNVQR-----RGPLKRPVETTAKVM-----

>DUF177A\_Physcomi trel la \_patens

MI PHI QLEI SENNPFYI HRLVI QLEPSGI RSTQDRRSSSSKRPVVAGDEARDLVGGAWTTSSAMATASSTSLPAAAPQOP  
NVDSALGLQVHQLVACAELOSLHETRAVYKRGVFFRTTVKAAATKSQOQSLNQLVHMPAGFAEVGALDPDI SFHH--R  
PRLHHLCAESSQHGRCEVASRASSYKOGGWVRSNVACLGLVLTSCSSRRQYLRCVNSRODTSNERFRDNSNFSPALRP  
FI SRGHTRVLRQHNL PANPGVVEEEEOGTPWEGAI I FKRSAAQAQFEYVTTLERLGLTRFSSDKAMTLAFDMGL-----  
GKVEVDGI VGTPLI SLDCSKEGRNDI RVDGI I RTALALVCNRCLAPCAERI FASFNLLLTDPV-EEP-TQPNLGVVGLG  
DNPHI --WSAEADDDAEALDI DLDDKLHFPREEKELDI SKYLRDTI HLEI PAKSLCDNDCPGFCFGCGVNLN-TDTCRC  
GKQKSKNNVNVEDLLGLNKNKDI WGPLLEQLKKQLEEQDRSDDSL

>DUF177A\_Amborell a \_tri chopoda

-----MAFSTLSCPLSPHLNHPQFS  
SKPSAKT-----PSFNQLESHL  
KPSKTLI SSSYS-----I SKPYTTRPI I SPSKGLI SI SSLHCTSETVS-----HESTE-----  
-----EVEDEGSPWEGAVVYKRDSSVTHLEYCTTLERLGLGKLSDDVSNRASSMGI ---RV  
TKGVTEYSSGTPVQI SI DVYRR-KQDI KLDGI LKTVI TLACNRCAEPAAECVFSDFTLTDEPI NEEN-DEMNFVLYG  
DDKWRSYKNVGVGEEAREEVI DLDDRLYFPLEEREI DI SKHI RDAVHVEI TI DAI CDANCRGLCLECGVNLN-KSRCGC  
GRKKNE---KRERE-----SSPLSGLKHQTYKO-----

>DUF177A\_Arabi dopsi s \_thal i ana

-----MSLVCSLSCVAPLPQTKQSRPSFLKLETCTLSLS  
SPAGY-----PNFTTGI --R  
KHI SYLFTEPI K-----LPRLAKSRI LVSQESFTETSTI DMD-----WEDQE-----  
-----EI EDTGSPWEGAVVYRRNASVTHVEYCTTLERLGLGRLSTDVSKKRASAMGL---RV  
TKDKVDYPDGTVPQVSDVI RK-KKKLRLDGI VRTVI TLGCFRCAEPAPQGI FANFSLLLTEEPV-EEP-DVI DLGFTFG  
NDKEE-----GEDDDNDDSWI DWEDKLHFPPEVEKEI DI SKHI RDLVHLEI TI TAI CDSACKGMCLKCGANLN-KRKCDC  
GREEKD-----KG-----YGPLGNLREQMQQKEGLRN--

>DUF177A\_Zea\_mays

-----MYYPQPTVSLAAAVALLR  
-----PSLRRHS--Q  
RASSLLRSSTPP-----PWVSARRRTAVSDDFF-----TVELDATGVEPEPDS-----  
-----I DDGLPSPWEGAVVYRRDAAVQHLEYASTLERLGLGDLSSPDSRARAADLGL--AGG  
TLDSTGAQPRTPVLVSDVTRR-RGRRLLDGI VRTVI TLGCFRCAEPAPQGI FANFSLLLTEDPVEEEP-----DLGTI FQ  
EDDDKGGASLACAMD--GDQDI DWDDRLHFPAADKEI DI SKHI RDMI HLEI TLDVAVCPNCKGLCLTCGANLNTTSSCTC  
KP-----RNVQG-----LSPLKGVFK-----

>DUF177B\_Physcomi trel la \_patens

-----MFPSSQQRWTHSLYSTHFVSDNAGAGVVKLRVLQYSQAVDMANVLLHTPRPSFS  
TPWGVSDSRWC-----LGFESRCGAG  
RVMGWCCRSGRV-----VVCTTGQHPPEPRKEFHVESKPVSKKLPKTNKKK-----  
-----EGRERVLVLI TVNRSDGKW--ADSWNTE-----QVTTLKDLNLEDI STDS-----  
SFQGPVKPKDLVHVELAVQKS-GWGFVQAQVRSVTRQCSRCFKTYFSPINGSFQAWLT--PTQDMF-VHPNGKSEEN  
GDPTV-----VYFPLGEEEADLTRMVRDTI KLNYSAKAI CSEECDKLG-----PRTWEV  
GGSQGR---PVDSR-----WLPLLKAKHNL-----

>DUF177B\_Oryza\_sativa

```
-----MARACSPALRLQLPPNP
PI TPQL-----PSCRTHSAGA
RCRGFAAAHSQP-----PAAGRPDEPAAEPSPKQPEI AQTQNLRRSRRRG-PGSRQ-----
-----SLVSVGTSCTGGDQWSSD-----FDLTLRQLHLDDLIED-----
-----GQNDADVLVHLLVQOHTQFGMSI KGRVVTFSFSKI CDSCSSPYCAKI DEQFNLTVLSSTRKEQS-EMPDI G---D
SDPSV-----I YVRPGV-EVDLDSVI QETI RLTAASAKSSCEACEKS-----TVVWQY
GGNQKK---RYSQR-----WSKLLDLKKTLDKAAN-----
```

>DUF177B\_Amborella\_trichopoda

```
-----
-----
-----
-----
-----MVLSI QKHVGFYYSI DGRI TTCFTRKCSNCLSPYCKEI DTHFNWVWLPSSKENHSLQLPEI G---G
DDPSV-----I YI NPRSPADLDSLVDKTI RLSTS--GVCSESCERS-----PQRWEC
GDPKEG---YDRR-----WSKLLQI KVTA-----
```

>DUF177B\_Sorghum\_bicolor

```
-----MARACNRALRLLPNSIA
-----TQLASSRSGA
RFRSLAVHAQLS-----TEDDAYSTEPLKKAQVTQSLRRTRRRGTGGARQ-----
-----SLVSVGTSCTGGDQWSSD-----I ELTLRQLHLDDLIED-----
-----GORDADVLVHLLVQOHTQFGMSI KGRVLTFRKI CDSCSLPYCTNI DERFNLTVLSSTRRQDS-GLPDLG---D
TDPSV-----I YVRPGD-EVDLDSVI QETVRLTASAKSSCSETCEKS-----TVVWQY
GGSQKK---KISSQR-----WSKLLDLKKTLDKAPK-----
```

>DUF177B\_Zea\_mays

```
-----MARACNHARLLPNSIA
-----TQLACSGGST
RCRNLVHAQLS-----TQDDAYTTEPPLKKAQVTQSLRRTRRRAPGGARQ-----
-----SLI SVGTSCGGDQWSSD-----I ALTLRQLRLDDLVED-----
-----GORDADVLVHLLVQOHTQFGMSI KGRVLTFRKI CDSCSLPYCTNI DEHFNLTVLSSTRRQDS-GLPDLG---D
TDPSV-----I YVRPGD-EVDLDSVI QETVRLTASTKSSCSETCEKS-----TVVWQY
GGSQKK---KTSSQR-----WSKLLDLKKTLDKAPK-----
```

>DUF177B\_Arabidopsis\_thaliana

```
-----MDVRCLI SPNLLNSKI K
-----VSGNTHH---L
PFSSLSKKHQAS-----SPI QAAI NGGGSSKTVKRLI-----
-----TLPSEGKWNGN--WKTQ-----YDVSLRDLQLQDLVED-----
-----GPPNSRVSDLSVQRHASMGLSVDGRI MTSI ARKCSI CSSLYPRLI DTSFTVWI LPSSRENRASTLPEI G---G
DDPSV-----I YVRPGY-EANLDSLVDQTI RLTTYAKDI CSDSCEKSE-----PTLHYV
GQTNTA---SVDKR-----WSRLELELKKK-----
```
