# Supplementary material for: Essential role of conserved DUF177A protein in plastid 23S rRNA accumulation and plant embryogenesis
Source: PubMed Central journal article supplement (PMC5049393; doi:10.1093/jxb/erw311), 2016-08-29
Supplement: supp_erw311_Supplementary_Data_S2.pdf [file supp_erw311_Supplementary_Data_S2.pdf]

>DUF177 Chlamydia\_trachomatis (Chlamydiae)  
-QGTTARVHAECSTRCLMPLHRDWSVDVCAFFAQV---ESKGGARSNNKFNRSNGDNDL-----ED-----A  
DIWDEGDDSGNVYPLVGGGDF-ADIEALIRDTMVSELPLKPLCEPDKCKGLCSQCGENLN-EHP-NHHHDIT-----  
-----DIRFAALEGLK

>DUF177 Porphyridium cruentum (Rhodophyta)  
LRGRVSTVLNACDRCLDEFPPQSRGEFELWLATR---EDLV-----PMIDGPDDTR-----AD-----  
-----EAVEKFTDDILA-VDLTPHVYDAIMLSVPIKCLCREDCPGL-----  
-----

>DUF177 Galdieria sulphuraria (Rhodophyta)  
-KSRVNTCLTCECDRCLNPFRLAVEGYFQLLLSSN---PNVQ-----EVDHSVVGGEKET-----QQLTSTT  
VGFEDLEMEVWEPFTSDVDQ-VSLYSHVYDSVMLSLPSKILCDESCPGIP-----  
-----

>DUF177 Thermus scotoductus (Deinococcus Thermus)  
LSGEVEGVVLMCECRCLKPTPTPIHAHFQHLRLRYQ---QGLE-----EVVFHEEKKE-----  
-----EYYAFGEPPD-LDLLPFLTEAFVTEMPYTVLCEECKGLCPVCGADRNLVD-CGHEPEV-----  
-----HHPLLGLKDL-

>DUF177 Atopobium sp.(Actinobacteria)  
-TGMLNAHVVGCDRCLCKAEFDVAGEVDEYFLFH---EPD-----PASLGDEDE-----ID-----  
-----FALVSADQT-IDLSEALSSALLMETPFVVLCKPDCRGLCPVCGANLN-EED-CGHAAQIEQDRLS---  
-----SSPFAKLKELK

>DUF177 Dictyoglomus turgidum (Dictyoglomus\_turgidum)  
-KGS�TKIKLVCSCLREFPYELEAKIQEIYLWD---IPIQ-----RNISPGEIIEL-----KD-----  
-----EDFKFVLEKES-LFLDPLVEDIIRLNIPVKPLCRPDKCKGLCPGCGQDLN-LGE-CECSKIQV-----  
-----DPRWEPLMKF-

>DUF177 Synechococcus\_sp.(Cyanobacteria)  
-SAEARTIVTLTCHRCLOQFNHRLHLEVEEIIILIR---DPE-----PLPLELELQDEEDL-----  
-----LESIPPNGE-LDVEDWMYQHLHLEMPRQLPCRPDPCGIAVEATAPTA-----  
-----DPRWAALASL-

>DUF177 Thermotoga sp.(Thermotogae)  
--GYVHTAVEHPARCLEPARVEIRGVIEALYLPE---SMRK-----NVKEEKLESL-----KN-----  
-----IIYYHETE--FDLSERIIIEAIVVAIPEKVLCKPDKCKGLCPYCGANLN-EEDHKCDKIPVV-----  
-----DSRFELLAELK

>DUF177 Clostridium sp.(Clostridia)  
VQGTIVANVKLVCDRCLKDFVKKMKVDVDETYLLG---HLIA-----NEDAHSGQELEL-----KD-----  
-----GDFVTELTGTDE-VDIDDLIYQSVTLNIPNCPVCDINCNG-----DAEMEKYMKKEIS-----  
-----DPRLEVFKNLK

>DUF177 Geobacter uraniireducens (Deltaproteobacteria)  
-AGKVETAVMMNCSLCLGEYDTEIASSFTVFYTKA---SGMA-----LDEEVELAEEDLI-----  
-----SKSYEGDE-IDFAPEVAEQVIMEIPFKPLCKEDCAGLCSKCGVNLN-ETA-CNCDRSEG-----  
-----GFKFGALKGIK

>DUF177 Ktedonobacter racemifer (Chloroflexi)  
VDGWVDTLVELECTRCLKHFEPQHVDFEERFYPT---VDVV-----TGIPVEPVDAEDA-----  
-----FPIDHHLVDLTEAIRQVLLAIPVTLCREDCAGLCAQCGKDLN-EGP-CECQPEP-----  
-----DARFSVLKTL-

>DUF177 Clostridium leptum (Firmicutes)  
-KADVAFDRCPCDRCAAETQRAYRFSFHVLVNA-----LNDEENDT-----  
-----FLLVENES-IELDDLREDILLELPTKFLCKPDKCKGLCPQCGKLN-EGK-CGCSARQV-----  
-----DPRLEILKKL-

>DUF177 Persephonella marina (Aquificae)  
-SLTINSIDIKLECGRCLESFVMDLKGTSIFLSK-----KLDGDSSELHEEDLI-----  
-----VEYLEDEEH-FNVSELLREEIIVKTPMKPLCDEDCKGICPVCNSNRN-ENP-CNCEQEMVRE-----  
-----ESPFAKLKTL-

>DUF177 Guillardia theta (Cryptophyta)  
LKVHMQSHLLCTCNRCLLEEFHLPISDFSLVLASR---RKLCQIAKRADDVSEISENKDL-----VD-----  
-----DSIIDFSAGINY-IDLDPEVGESLGAIPLRKVCSPCKGRCATCGQNLNLPNTCRRVPQ-----  
-----EER-----

>DUF177 Bathycoccus prasinos (Chlorophyta)  
LQAEITGHIRCHCDACDGKFNLPVKSFGKFLFDEH-----ATAFGDVSGDLEIV-----  
-----PFPRSTEH-VDLTTSVARSWIEMNLKEEFLCDE-----CGEND-----  
-----

>DUF177A2 *Oryza sativa*  
-----CAEPAPQGIFANFSLLLTEGRV-EEPD-----VVDLGTIFEEEQTK-APVLTGSQED-GD-----  
---DEDIDWDDRLHFHPAGEKE-VDISKHIRDIIHLEITLDALCSPTCKGLCVGCGENLN-TSS-CSCNTEKQQA-----  
-----  
>DUF177A1 *Oryza sativa*  
LDGIVRTVITLGCYCAEPAPQGIFANFSLLLTEDRV-EEPD-----VVDLGTIFEEEQTK-APSLTGSQED-GD-----  
---DEDIDWDDRLHFHPAGEKE-IDISKHIRDIIHLEITLDALCSPTCKGLCLGCGENLN-TSS-CSCNAEKQ-QAKN---  
-----VQRRGPKDL-  
>DUF177A *Medicago truncatula*  
LDGIIKTVTLVLCNRCCMPAESIFSEFSLLLTEPPVNEPE-----TMDFGVIFGEDKIP---TLGKSGDDDED-----  
----ALIDLDDQLYFPPEEKQ-IDISKNIRDRVHLEITMNSVCDGCKGKGVCLKCGQNFN-TGN-CSCSKEEVK-----  
-----EESFGPLRNL-  
>DUF177A *Sorghum bicolor*  
LDGIVRTVITLGCFRCAEPAPQGIFANFSLLLTEDPV-EEPD-----VVDLGTIFEDIAK-GASLAGTMDNQDD-----  
---DQDIDWDDRLHFPAADRE-IDISKHIRDIIHLEITLDAVCPNCKGLCLSCGANLN-TSS-CTCNKGKPKPEPN---  
-----VKGRGPLKEL-  
>DUF177A *Arabidopsis thaliana*  
LDGIVRTVITLGCNRCGESTGESIFSNFSLLLTEEPV-EEPD-----VIDLGFTEFGNDKEE-----GEDDDND-----  
---DSWIDWEDKLFHPPEVKE-IDISKHIRDLVHLEITITAICDSACKGMCLKCGANLN--KRKDCGREEK-----  
-----DKGYGPLGNL-  
>DUF177A *Physcomitrella patens*  
VDGIIRTALALVCNRCCLAPCAERIFASFNLLLTDPV-EEPT-----QPNLGVVLGDNPHI---WSAEADDDAEA-----  
---ELDIDLDDKLFHPREEKE-LDISKYLRTIHLIIPAKSLCDNDCPGFCFGCGVNLN-TDTCRCGKQKSKNNVNE-  
DLLGLNKNKDIWGPLEQLK  
>DUF177A *Amborella trichopoda*  
LDGILKTVITLACNRCAEPAAECVFSDFTLTLLTDEPINEEND-----EMNFGVLYGDDKRSYKNVGVGEEARE-----  
---EVIDLDDRLYFPLEERE-IDISKHIRDAVHVEITIDAICDANCRGLCLECGVNLN--KSRCGCGRKKNEKR-----  
-----ERESSPLSGLK  
>DUF177A *Vitis vinifera*  
LDGLLRTVITLGCNRCGEPAEACIFSNFSLLLTEEPI-EEQE-----VINMGVIFGEDDKL--KTSTESSEE-DD-----  
---EASIDLDDWLYFPPEETE-IDISKHIRDMVHLEITINAVCDSRCKGICLKCGINLN-TAS-CNCSKEEVK-----  
-----EKGYGPLGV--  
>DUF177A *Zea mays*  
LDGIVRTVITLGCFRCAEPAPQGIFANFSLLLTEDPVVEEEDP-----LGTIFQEDDDKGGASLACAMDGDQD-----  
-----IDWDDRLHFPAADKE-IDISKHIRDMIHLEITLDAVCPNCKGLCLTCGANLN-TTSSCTCK-----  
-----PRNVQGLSPLK  
>DUF177B *Oryza sativa*  
-KGRVVTFSKICDSCSSPYCAKIDEQFNLTVLSS---TRKE-----QSEMPDIGSDPSV-----  
-----IYVRPGVE-VLDLSVIQETIRLTASAKSSCSEACEKSTV-----VWQYGGNQKKRY-----  
-----SQRWSKLLDLK  
>DUF177B *Arabidopsis thaliana*  
VDGRIMTSIARKCSICSSLYPRLIDTSFTVWILPS---SREN---RASTLPEIGDDPSV-----  
-----IYVRPGYE-ANLDSLVDQITIRLTYYAKDICSDSCEKSEP-----TLHYVQNTASV-----  
-----DKRWSRLELLEK  
>DUF177B *Zea mays*  
-KGRVLTFRKICDSCSLPYCTNIDEHFNLTVLSS---TRRD-----QSGPLDLGDTDPSV-----  
-----IYVRPGDE-VLDLSVIQETVRLTASTKSSCSETCEKSTV-----VWQYGGSQKKKTS-----  
-----SQRWSKLLDLK  
>DUF177B *Vitis vinifera*  
VDGRIITSFTRKCSNCSSPYCKEVDNFTVWVLP---SREN-----CGLAEIGDDPSL-----  
-----SDLY-----TIRLTTSVKDTCSETCEKSEP-----TLQYIGAKNAASI-----  
-----DMRWSRLELLEK  
>DUF177B *Sorghum bicolor*  
-KGRVLTFRKICDSCSLPYCTNIDERFNLTVLSS---TRRD-----QSGPLDLGDTDPSV-----  
-----IYVRPGDE-VLDLSVIQETVRLTASAKSSCSETCEKSTV-----VWQYGGSQKKKIS-----  
-----SQRWSKLLDLK  
>DUF177B *Medicago truncatula*  
VDARITTSFPSKCSNCSSPYCRQIDAKFNWVLR---TNRD---KRKTPLEI-GDDPYV-----  
-----IYTRPGYE-VLDLSIVKDAIRLNSAVNDTCSELCKKSEGT-----IQNTSGSQASAF-----  
-----DKRWSRLELLEK

```

>DUF177B Amborella trichopoda
-DGRITTCFTRKCSNCLSPYCKEIDTHFNWVWVLPV---SKEN---HSLQLPEIGGDDPSV-----
-----IYINPRSPD-ADLDSLVKDTIRLSTSGV--CSESCERSPQ-----RWE-CGDPKEGYT-----
-----DRRWSKLLQIK
>DUF177B Physcomitrella patens
VQAQVRSTVRQQCSRCKTYFSPINGSFQAWLTPT---QDMF---VHPNGKSEENGDPV-----
-----VYFPLGEEE-ADLTRMVRDTIKLNYSAKAICSEECDKLGPR-----TWEVGGSQGRP-----
-----DSRWLPL-----
>DUF177 Escherichia coli (Gammaproteobacteria)
LNGDAKVTVTLECRQCGKPFTHQVYTTYCFSPVRS---DEQA-----EALPEAYEPI-----
-----EVNEFGE-IDLLAMVEDEIILALPVVPVHDSE---HCEVSEADMV-FGELPEEAQK-----
-----PNPFAVLASLK
>DUF177 Pseudomonas aeruginosa (Gammaproteobacteria)
-HMQLDTEVSMVCQRCLDAAAIIPVHGEYTYAILRE---GQSA-----DGLPKGYDAL-----
-----EVGEEP-LDLLALVEDELLALPIVPAHDPE---VCQ-HPAGFVVEDEPESESSEVEDKR-----
-----PNPFSVLAQLK
>DUF177 Comamonas testosteroni (Betaproteobacteria)
-HLSAEVALPLTCQRCLTEADIPLYVDRSFRFVVD---EATA-----ELEDDDSDE-----
-----DVLALSSE-FNLLLELIEDELLMEVPVPRH-EVCP-VPVKLEVSDDAFEQA-NEQK-----
-----ENPFAVLQSL-
>DUF177 Burkholderia xenovorans (Betaproteobacteria)
-RLAIHGAAWLECRQCMPTPYLQAFNV DATYRVVNT---EAEA-----EEFPLDEDEV-----
-----EVIVGSNH-FDLIDLIEEELLSLPLVPKHE-VCPEVHESLVSGVAGAEGEDEDESAPDEAGKGD
EPER---PSPFAALQSLK
>DUF177 Magnetococcus marinus (Alphaproteobacteria)
VTGTVTATVSMNCSRCLVDFERLLEGDVERWYATG---VDPN-----NGSMGELAVTDETV-----
-----YLEDDL-FTLAPLADEELLHLPMVPLCGEGCKGICACGANLN-EGP-CGCDGDPQ-----
-----DSPFAALKLLK

```
